# Supplementary material for: Synergistically enhanced multienzyme catalytic nanoconjugates for efficient cancer therapy
Source: Royal Society of Chemistry journal article supplement (doi:10.1039/d1tb00821h), 2021-01-01
Supplement: d1tb00821h1.pdf [file d1tb00821h1.pdf]

## Electronic Supplementary Information (ESI) for:

### Synergistically Enhanced Multienzyme Catalytic Nanoconjugates for Efficient Cancer Therapy

Sheng-Yan Yin,<sup>a</sup> Wei Liu,<sup>a</sup> Jinfeng Yang<sup>b</sup> and Jishan Li<sup>\*a</sup>

<sup>a</sup>State Key Laboratory of Chemo/Biosensing and Chemometrics, College of Chemistry and Chemical Engineering, Hunan University, Changsha, 410082, China.

<sup>b</sup>Tumor Hospital, Xiangya School of Medicine, Central South University, Changsha 410013, China.

E-mail: jishanli@hnu.edu.cn; Fax: +86-731-88821848

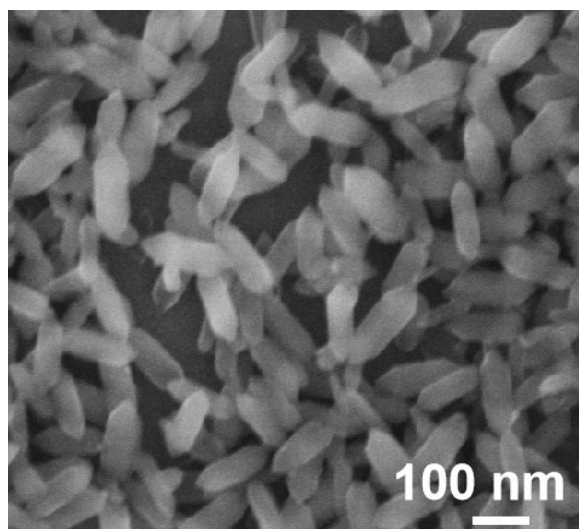

**Fig.S1** SEM images of the Fe-porphyrin-MOF nanoparticles.

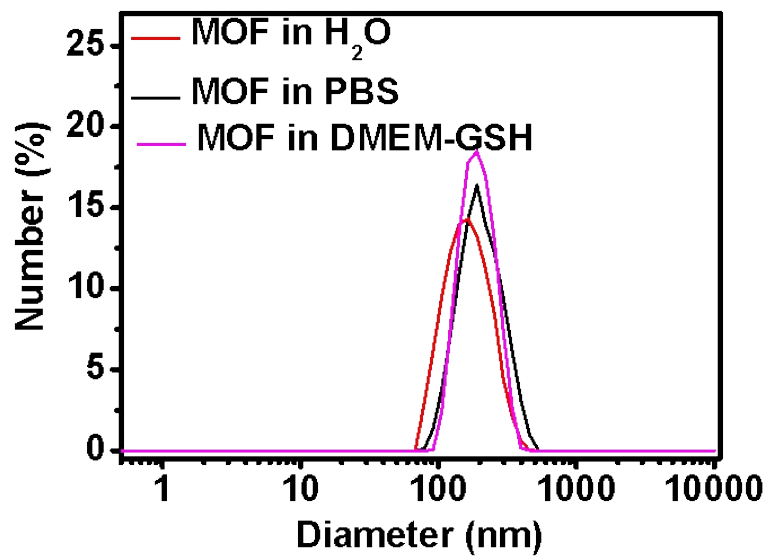

**Fig.S2** Hydrodynamic size distribution of the Fe-porphyrin-MOF nanoparticles after incubated in H<sub>2</sub>O, PBS (pH 6.8) and DMEM-10mM GSH for 36 h.

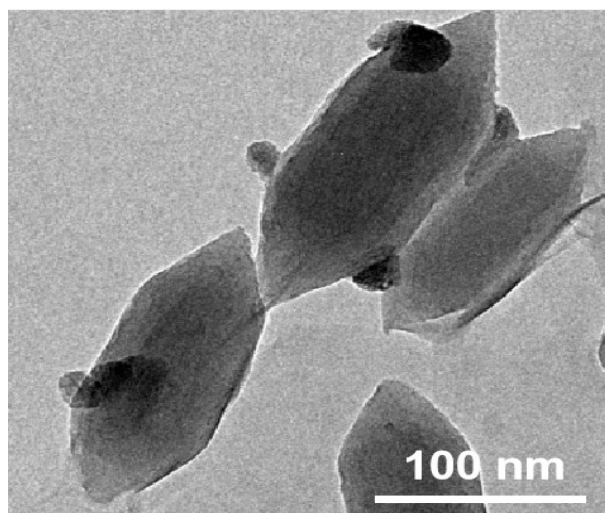

**Fig.S3** TEM images of the Fe-porphyrin-MOF nanoparticles after incubated in DMEM-10mM GSH for 36 h.

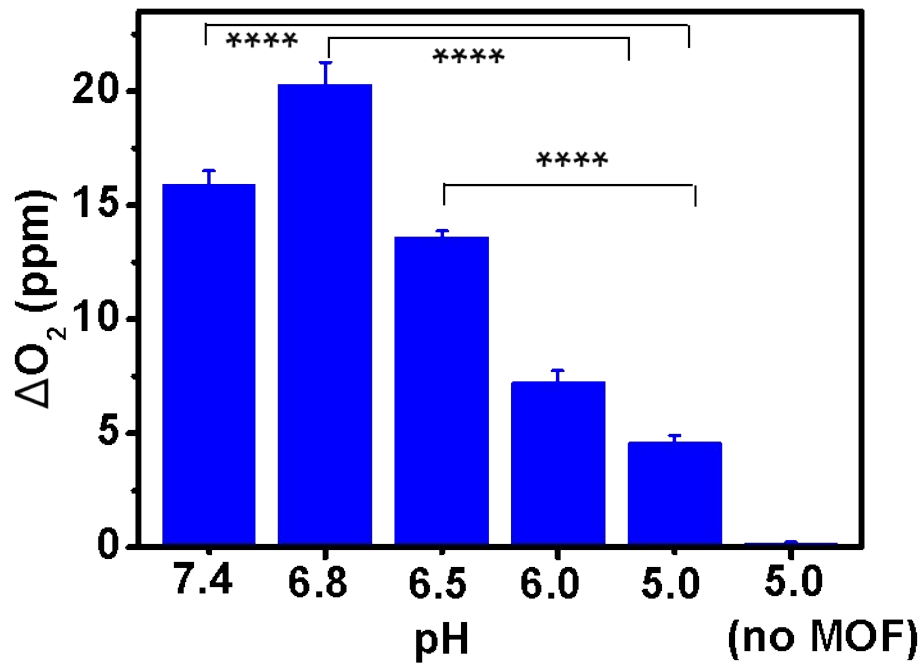

**Fig.S4** The change of O<sub>2</sub> concentration for a mixture solution of Fe-porphyrin-MOF nanoparticles (200 μg/mL) and H<sub>2</sub>O<sub>2</sub> (2.5 mM) in PBS with different pH values after being incubated for 30 min, (\*\*\*\*p < 0.0001).

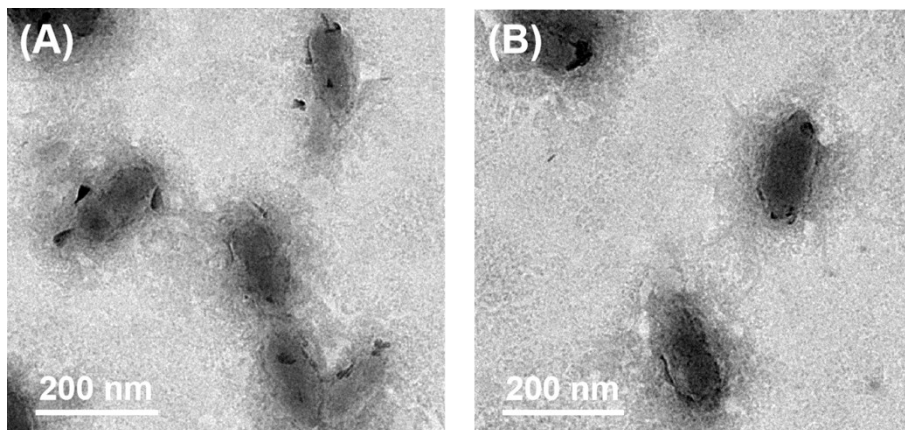

**Fig.S5** TEM images of the C<sub>1</sub>@M@C<sub>2</sub>G nanoparticles after incubated in PBS (A) and FBS (B) for 36 h.

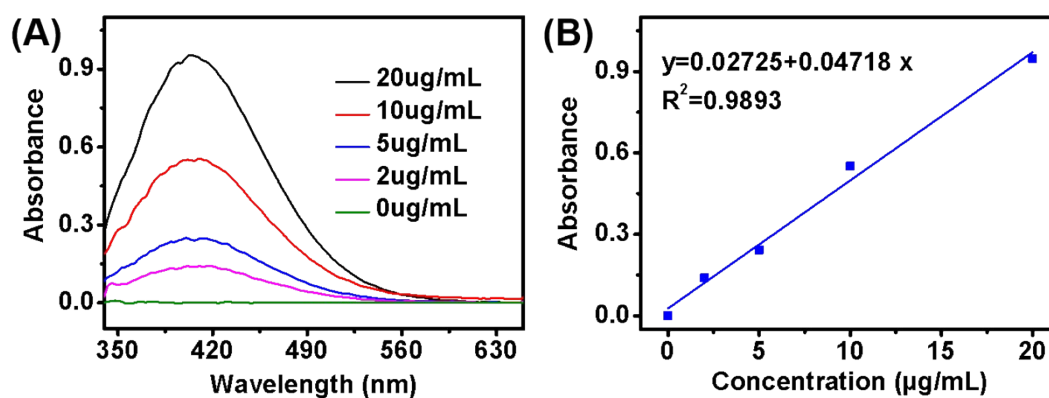

**Fig. S6** (A) UV-vis absorption spectra of the titanium sulfate solution (1%) mixed with the solution of GOD (0, 2, 5, 10, and 20 µg/mL, respectively) and glucose (5 mg/mL) in PBS (pH 6.8). (B) The calibration curve of absorbance at 408 nm.

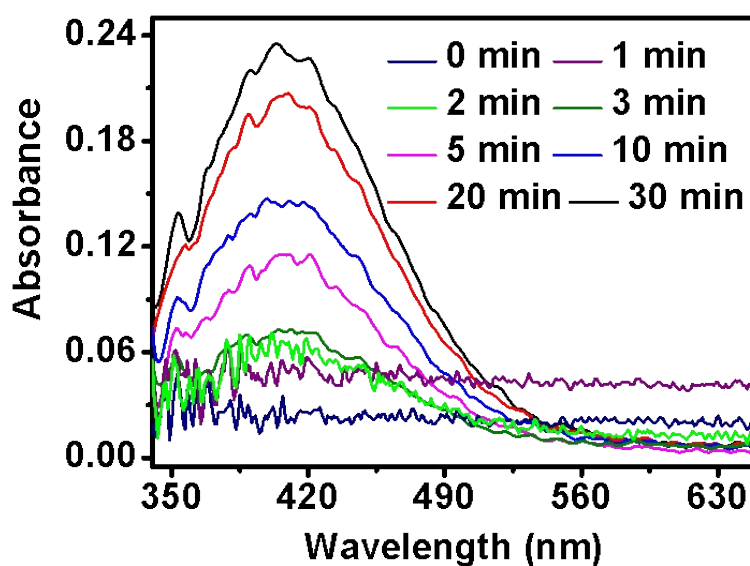

**Fig. S7** UV-vis absorption spectra of the titanium sulfate solution (1%) mixed with the solution of C<sub>1</sub>@M@C<sub>2</sub>G (200 µg/mL) and glucose (5 mg/mL) in PBS (pH 6.8) for different time.

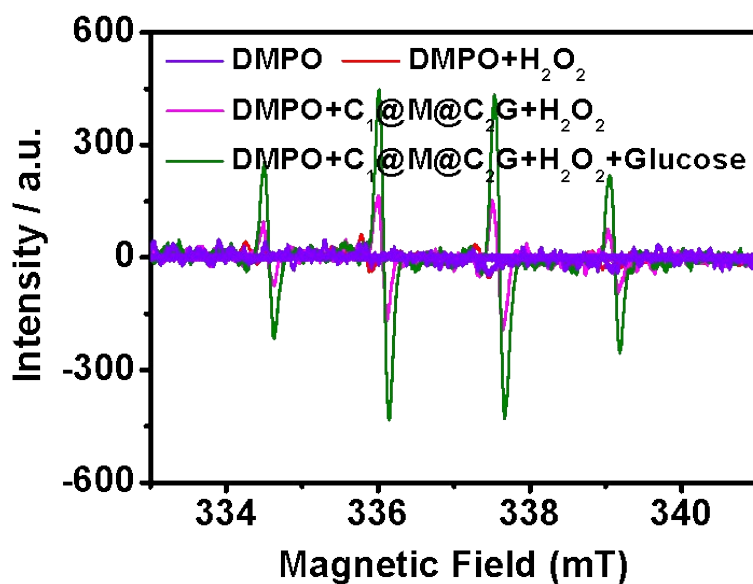

Fig.S8 ESR spectrum of  $\bullet\text{OH}$  for different mixture solutions (The concentration is 7.6 mg/mL for DMPO, 200  $\mu\text{g}/\text{mL}$  for  $\text{C}_1\text{@M@C}_2\text{G}$ , 0.25 mM for  $\text{H}_2\text{O}_2$  and 1 mg/mL for glucose).

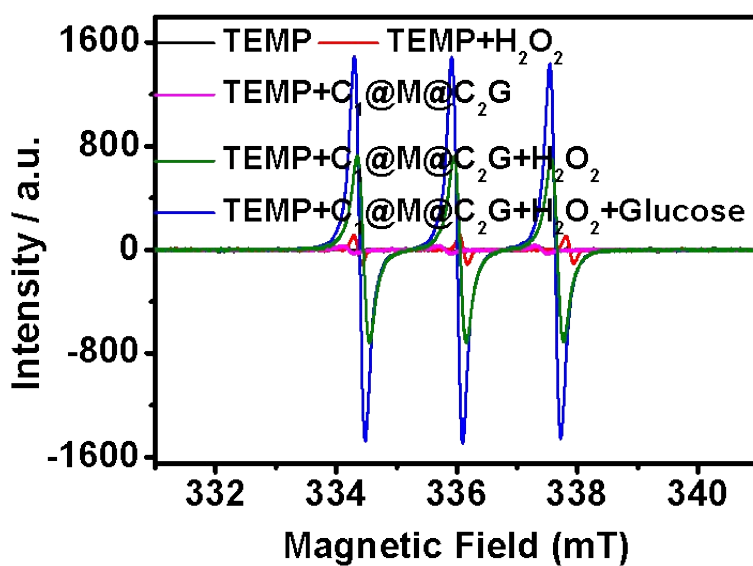

Fig.S9 ESR spectrum of  $^1\text{O}_2$  for different mixture solutions (The concentration is 24.4 mg/mL for TEMP, 200  $\mu\text{g}/\text{mL}$  for  $\text{C}_1\text{@M@C}_2\text{G}$ , 0.25 mM for  $\text{H}_2\text{O}_2$  and 1 mg/mL for glucose).

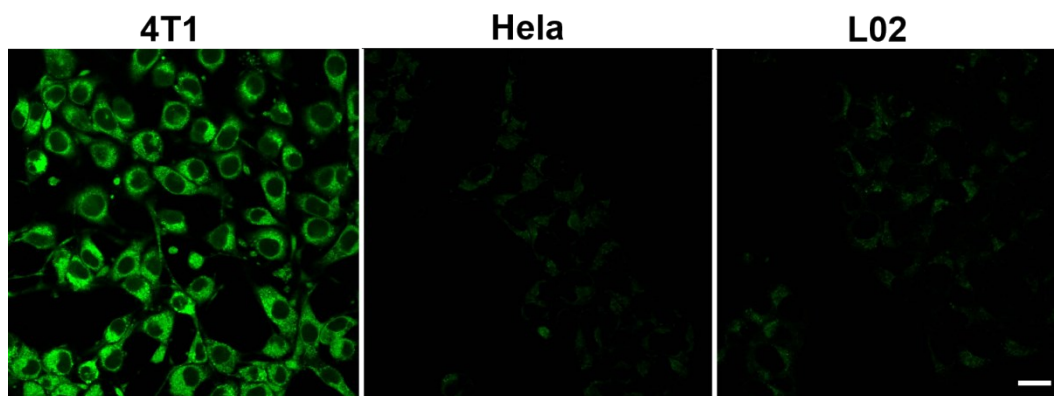

**Fig.S10** Fluorescence images of the 4T1, HeLa and L02 cells incubated with  $C_1@M@C_2G$  particles (50  $\mu\text{g}/\text{mL}$ ) for 4 h. Scale bar: 20  $\mu\text{m}$ .

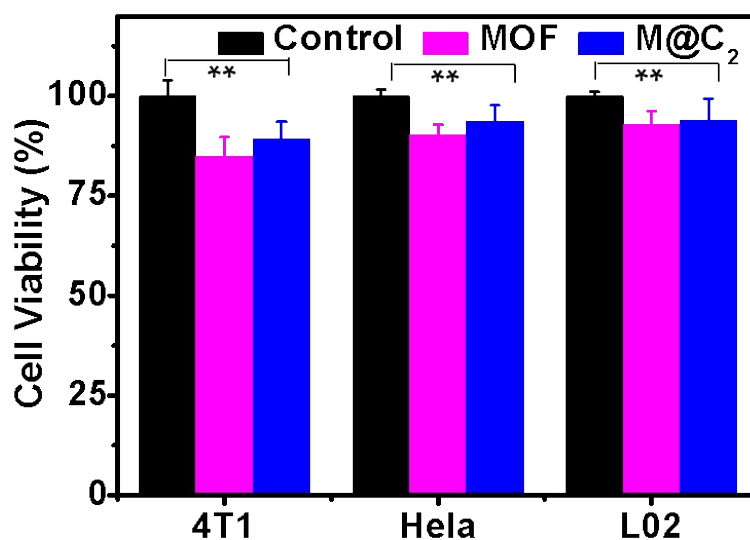

**Fig.S11** Cell viability of L02, HeLa and 4T1 cells treated with Fe-porphyrin-MOF particles (200  $\mu\text{g}/\text{mL}$ ) or M@C<sub>2</sub> particles (200  $\mu\text{g}/\text{mL}$ ) for 48 h, (\*\* $p < 0.01$ ).

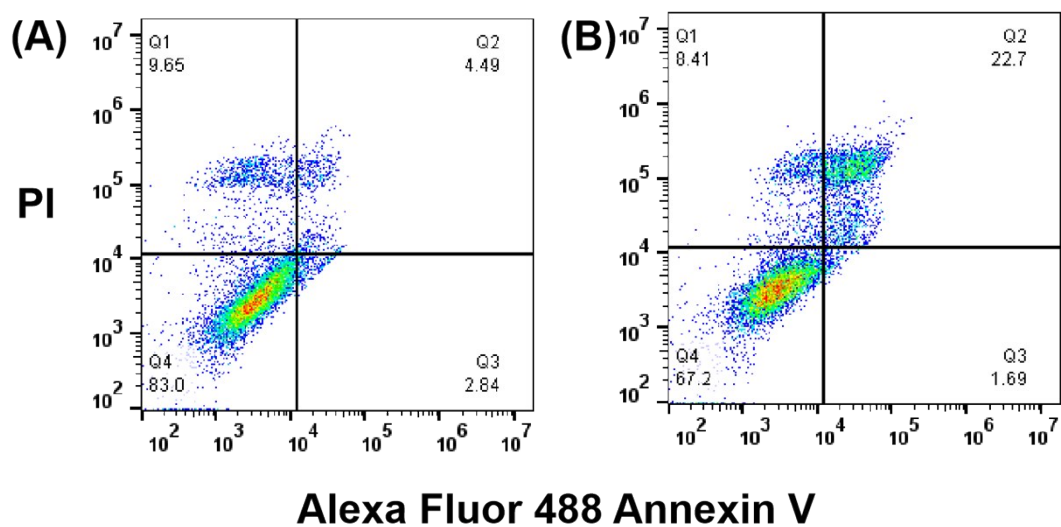

**Fig.S12** Flow cytometry analysis of 4T1 cells of control (A) and C<sub>1</sub>@M@C<sub>2</sub>G (B).

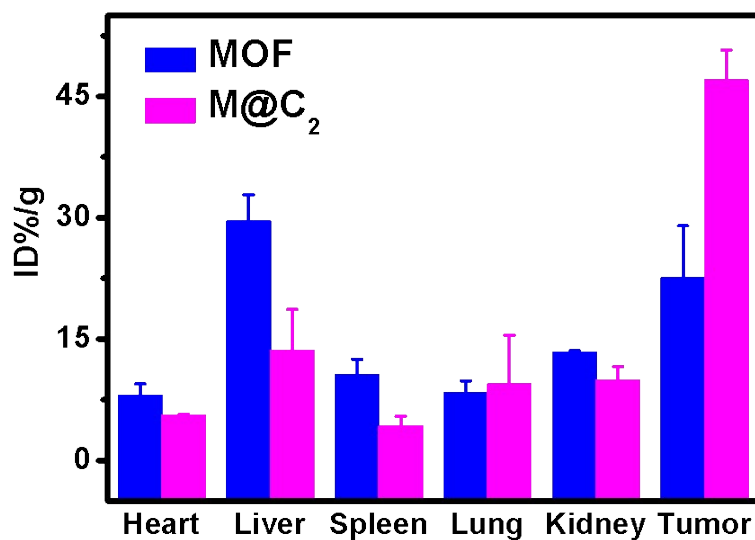

**Fig.S13** Biodistribution of the Fe-porphyrin-MOF nanoparticles or the M@C<sub>2</sub> nanoparticles in various organs and tumors of the mice, which is resulted from ICP-MS measurements.



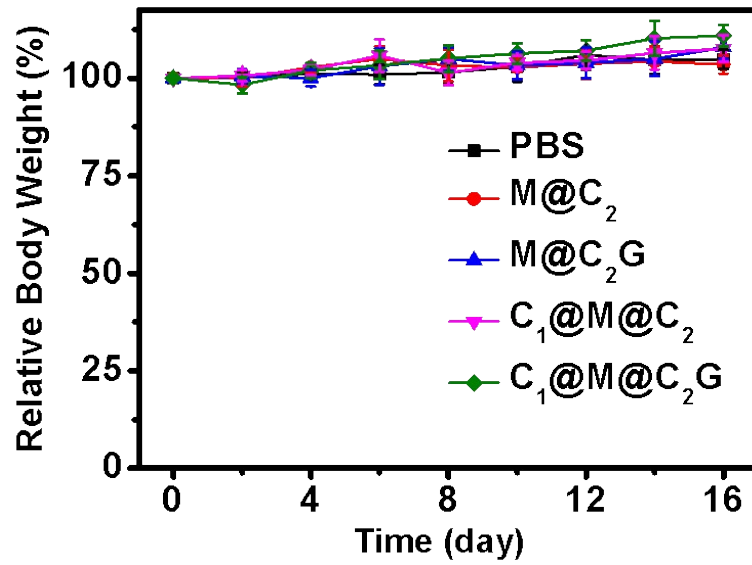

Fig.S14 Body weight changes in each group mice during the treatment period.

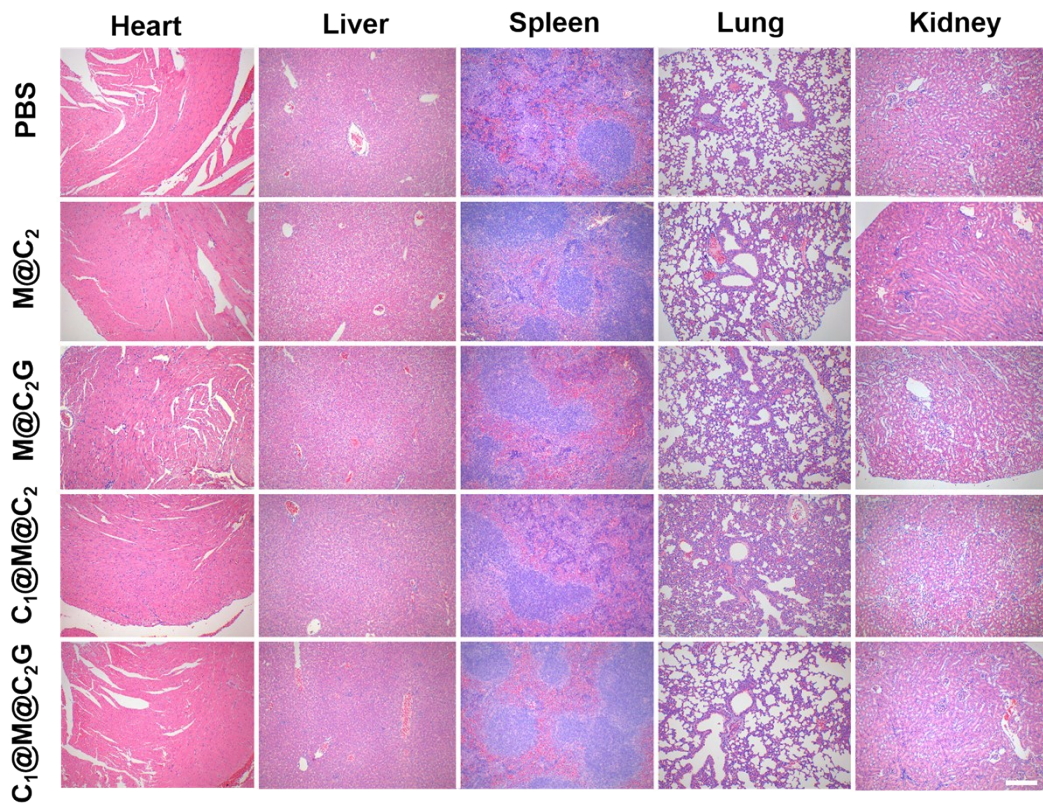

Fig.S15 Hematoxylin and eosin (H&E) staining of the main organs' sections for different groups.

Scale bar: 100  $\mu$ m.
